# Supplementary material for: Impact of Amiodarone Therapy on the Ablation Outcome of Ventricular Tachycardia in Arrhythmogenic Right Ventricular Cardiomyopathy
Source: MDPI journal article supplement (doi:10.3390/jcm11247265), 2022-12-07
Supplement: s1 [file s1]

**Supplemental Table S1. Comparison of substrate characteristics between patients with different periods on amiodarone before ablation**

|                                                 | Amiodarone > 6 months<br>(N = 21) | Amiodarone more than<br>8 weeks and ≤ 6 months<br>(N = 22) | <i>p</i> -value |
|-------------------------------------------------|-----------------------------------|------------------------------------------------------------|-----------------|
| <b>RV endocardium</b>                           |                                   |                                                            |                 |
| Bipolar voltage*                                | 1.8 ± 0.6                         | 2.0 ± 0.7                                                  | 0.222           |
| Unipolar voltage*                               | 4.9 ± 1.7                         | 4.9 ± 1.2                                                  | 0.999           |
| Total activation time<br>(ms)                   | 167.4 ± 27.2                      | 161.3 ± 34.2                                               | 0.496           |
| Bipolar low voltage<br>zone (cm <sup>2</sup> )  | 40.4 ± 32.3                       | 29.2 ± 20.9                                                | 0.185           |
| Bipolar low voltage<br>zone, %                  | 17.3 ± 12.9                       | 13.6 ± 8.0                                                 | 0.262           |
| Bipolar scar (cm <sup>2</sup> )                 | 19.5 ± 15.8                       | 15.4 ± 11.2                                                | 0.332           |
| Bipolar scar, %                                 | 8.8 ± 6.6                         | 7.3 ± 4.3                                                  | 0.385           |
| Unipolar low voltage<br>zone (cm <sup>2</sup> ) | 65.2 ± 34.2                       | 65.4 ± 21.2                                                | 0.977           |
| Unipolar low voltage<br>zone, %                 | 26.6 ± 12.8                       | 26.6 ± 7.9                                                 | 0.999           |
| Area with abnormal<br>electrograms              | 17.7 ± 17.4                       | 15.8 ± 13.7                                                | 0.692           |
| <b>RV epicardium</b>                            | <b>N=16</b>                       | <b>N=19</b>                                                |                 |
| Bipolar voltage*                                | 1.5 ± 1.0                         | 1.1 ± 0.4                                                  | 0.152           |
| Total activation time<br>(ms)                   | 212.3 ± 31.6                      | 210.3 ± 21.0                                               | 0.825           |
| Bipolar low voltage<br>zone (cm <sup>2</sup> )  | 97.6 ± 53.9                       | 123.2 ± 56.0                                               | 0.180           |
| Bipolar low voltage<br>zone, %                  | 33.1 ± 22.3                       | 38.9 ± 18.8                                                | 0.410           |
| Bipolar scar (cm <sup>2</sup> )                 | 51.1 ± 34.0                       | 61.2 ± 34.6                                                | 0.390           |
| Bipolar scar, %                                 | 17.4 ± 13.4                       | 18.6 ± 9.7                                                 | 0.756           |

|                                    |             |             |       |
|------------------------------------|-------------|-------------|-------|
| Area with abnormal<br>electrograms | 24.7 ± 30.1 | 31.8 ± 28.1 | 0.434 |
|------------------------------------|-------------|-------------|-------|

---

\*The average of bipolar or unipolar median voltage.

ARVC, arrhythmogenic right ventricular cardiomyopathy; RV, right ventricular; VT, ventricular tachycardia

“
